# Supplementary material for: Exploring Proteus mirabilis Methionine tRNA Synthetase Active Site: Homology Model Construction, Molecular Dynamics, Pharmacophore and Docking Validation
Source: MDPI journal article supplement (doi:10.3390/ph16091263), 2023-09-06
Supplement: s1 [file s1]

## Supplementary Data

# Exploring *Proteus mirabilis* MetRS active site: homology model construction, molecular dynamics, pharmacophore and docking validation

Samar S. Elbaramawi <sup>1</sup>, Ahmed G. Eissa<sup>1</sup>, Nada A. Noureldin <sup>1</sup> and Claire Simons <sup>2, \*</sup>

<sup>1</sup> Department of Medicinal Chemistry, Faculty of Pharmacy, Zagazig University, Zagazig, Egypt, P.C. 44519; sselbaramawy@pharmacy.zu.edu.eg (S.S.E.); ageissa@pharmacy.zu.edu.eg (A.G.E.); nanoureddine@pharmacy.zu.edu.eg (N.A.N.)

<sup>2</sup> School of Pharmacy & Pharmaceutical Sciences, Cardiff University, King Edward VII Avenue, Cardiff CF103NB, UK; simonsc@cardiff.ac.uk

\* Correspondence: C. S.: simonsc@cardiff.ac.uk

Table of content:

| Content                                                                                                                                                                                                                                                                  | Page No. |
|--------------------------------------------------------------------------------------------------------------------------------------------------------------------------------------------------------------------------------------------------------------------------|----------|
| <b>Figure S1.</b> Percent identity matrix created by Clustal alignment with <i>P. mirabilis</i> MetRS highlighted (red box)                                                                                                                                              | S2       |
| <b>Figure S2.</b> Amino acid sequence of <i>P. mirabilis</i> MetRS presenting $\alpha$ -helices in pink colour, $\beta$ -sheets in yellow colour, loops in grey colour.                                                                                                  | S3       |
| <b>Figure S3.</b> Predicted query <i>P. mirabilis</i> MetRS sequence secondary structure.                                                                                                                                                                                | S4       |
| <b>Figure S4.</b> Ramachandran plots – <i>P. mirabilis</i> MetRS homology model (MolProbability)                                                                                                                                                                         | S5       |
| <b>Figure S5.</b> Ramachandran plots – <i>E. coli</i> MetRS template (1F4L) (MolProbability)                                                                                                                                                                             | S6       |
| <b>Figure S6.</b> RMSD plots of protein-ligand complexes over 200 ns MD simulation.                                                                                                                                                                                      | S7       |
| <b>Figure S7.</b> 2D ligand interactions of the final frame of the protein-ligand complexes after 200 ns MD simulation.                                                                                                                                                  | S8       |
| <b>Figure S8.</b> (A) Change in position of MPH over 200 ns MD simulation: 50 ns (light pink), 100 ns (green), 150 ns (orange) and 200 ns (turquoise). (B) 2D ligand interactions of the <i>P. mirabilis</i> MetRS-MPH complex at 50, 100, 150 and 200 ns MD simulation. | S9       |
| <b>Figure S9:</b> Final <i>P. mirabilis</i> MetRS homology model with the characteristic domains in ribbon representation: Rossmann fold: red, connective peptide (CP): green, KMSKS domain: yellow and anticodon domain: purple.                                        | S10      |

|                                    |        |        |        |        |        |        |        |        |        |        |        |        |        |        |        |
|------------------------------------|--------|--------|--------|--------|--------|--------|--------|--------|--------|--------|--------|--------|--------|--------|--------|
| 1: sp P23395 SYM_THET8             | 100.00 | 42.02  | 41.24  | 42.48  | 39.84  | 23.12  | 24.19  | 24.91  | 24.24  | 24.06  | 31.67  | 28.14  | 25.80  | 27.01  | 26.85  |
| 2: sp P9MFU5 SYM_HYCTU             | 42.02  | 100.00 | 40.70  | 41.44  | 40.74  | 20.51  | 23.73  | 23.47  | 24.02  | 24.02  | 27.13  | 22.85  | 24.14  | 23.99  | 24.95  |
| 3: sp P67578 SYM_STAAM             | 41.24  | 40.70  | 100.00 | 58.87  | 55.38  | 21.10  | 22.69  | 24.45  | 23.82  | 23.82  | 27.74  | 25.08  | 24.96  | 28.04  | 28.32  |
| 4: sp Q837B3 SYM_ENTFA             | 42.48  | 41.44  | 58.87  | 100.00 | 62.29  | 23.43  | 23.42  | 24.50  | 24.04  | 25.04  | 28.24  | 26.97  | 26.50  | 27.96  | 28.39  |
| 5: sp Q9A178 SYM_STRP1             | 39.84  | 40.74  | 55.38  | 62.29  | 100.00 | 23.66  | 23.24  | 24.50  | 25.04  | 24.37  | 27.13  | 26.27  | 25.40  | 27.50  | 27.78  |
| 6: tr A6ZUS2 A6ZUS2_YEAS7          | 23.12  | 20.51  | 21.10  | 23.43  | 23.66  | 100.00 | 46.20  | 45.17  | 44.00  | 43.47  | 35.90  | 28.81  | 29.83  | 28.14  | 27.77  |
| 7: tr A0A3P9BIE1 A0A3P9BIE1_9CICH  | 24.19  | 23.73  | 22.69  | 23.42  | 23.24  | 46.20  | 100.00 | 64.86  | 63.90  | 63.41  | 34.41  | 27.56  | 28.50  | 27.27  | 27.89  |
| 8: sp Q6PF21 SYMC_XENLA            | 24.91  | 23.47  | 24.45  | 24.50  | 24.50  | 45.17  | 64.86  | 100.00 | 68.27  | 68.34  | 34.72  | 28.41  | 27.05  | 26.97  | 27.42  |
| 9: sp P56192 SYMC_HUMAN            | 24.24  | 24.02  | 23.82  | 24.04  | 25.04  | 44.00  | 63.90  | 68.27  | 100.00 | 89.67  | 34.30  | 27.08  | 27.03  | 27.91  | 27.24  |
| 10: sp Q68FL6 SYMC_MOUSE           | 24.06  | 24.02  | 23.82  | 25.04  | 24.37  | 43.47  | 63.41  | 68.34  | 89.67  | 100.00 | 34.79  | 27.24  | 26.20  | 26.74  | 26.25  |
| 11: sp Q9V011 SYM_PYRAB            | 31.67  | 27.13  | 27.74  | 28.24  | 27.13  | 35.90  | 34.41  | 34.72  | 34.30  | 34.79  | 100.00 | 33.09  | 32.14  | 34.68  | 34.43  |
| 12: tr A0A0D5YKJ7 A0A0D5YKJ7_ACIBA | 28.14  | 22.85  | 25.08  | 26.97  | 26.27  | 28.81  | 27.56  | 28.41  | 27.08  | 27.24  | 33.09  | 100.00 | 61.90  | 57.70  | 58.72  |
| 13: sp Q9HYC7 SYM_PSEAE            | 25.80  | 24.14  | 24.96  | 26.50  | 25.40  | 29.83  | 28.50  | 27.05  | 27.03  | 26.20  | 32.14  | 61.90  | 100.00 | 62.46  | 65.48  |
| 14: sp B4ESY6 SYM_PROMH            | 27.01  | 23.99  | 28.04  | 27.96  | 27.50  | 28.14  | 27.27  | 26.97  | 27.91  | 26.74  | 34.68  | 57.70  | 62.46  | 100.00 | 80.15  |
| 15: sp P00959 SYM_ECOLI            | 26.85  | 24.95  | 28.32  | 28.39  | 27.78  | 27.77  | 27.89  | 27.42  | 27.24  | 26.25  | 34.43  | 58.72  | 65.48  | 80.15  | 100.00 |

Figure S1.

Percent identity matrix created by Clustal alignment with *P. mirabilis* MetRS highlighted (red box)

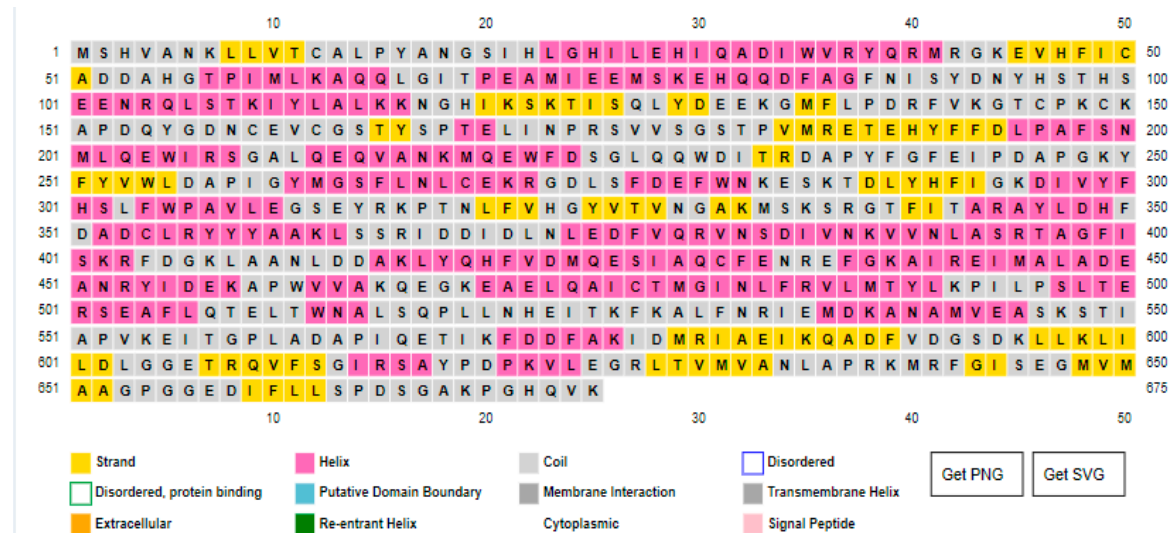

**Figure S2.** Amino acid sequence of *P. mirabilis* MetRS presenting  $\alpha$ -helices in pink colour,  $\beta$ -sheets in yellow colour, loops in grey colour.

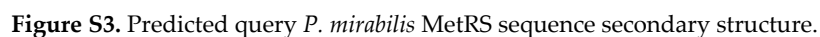



# MolProbity Ramachandran analysis

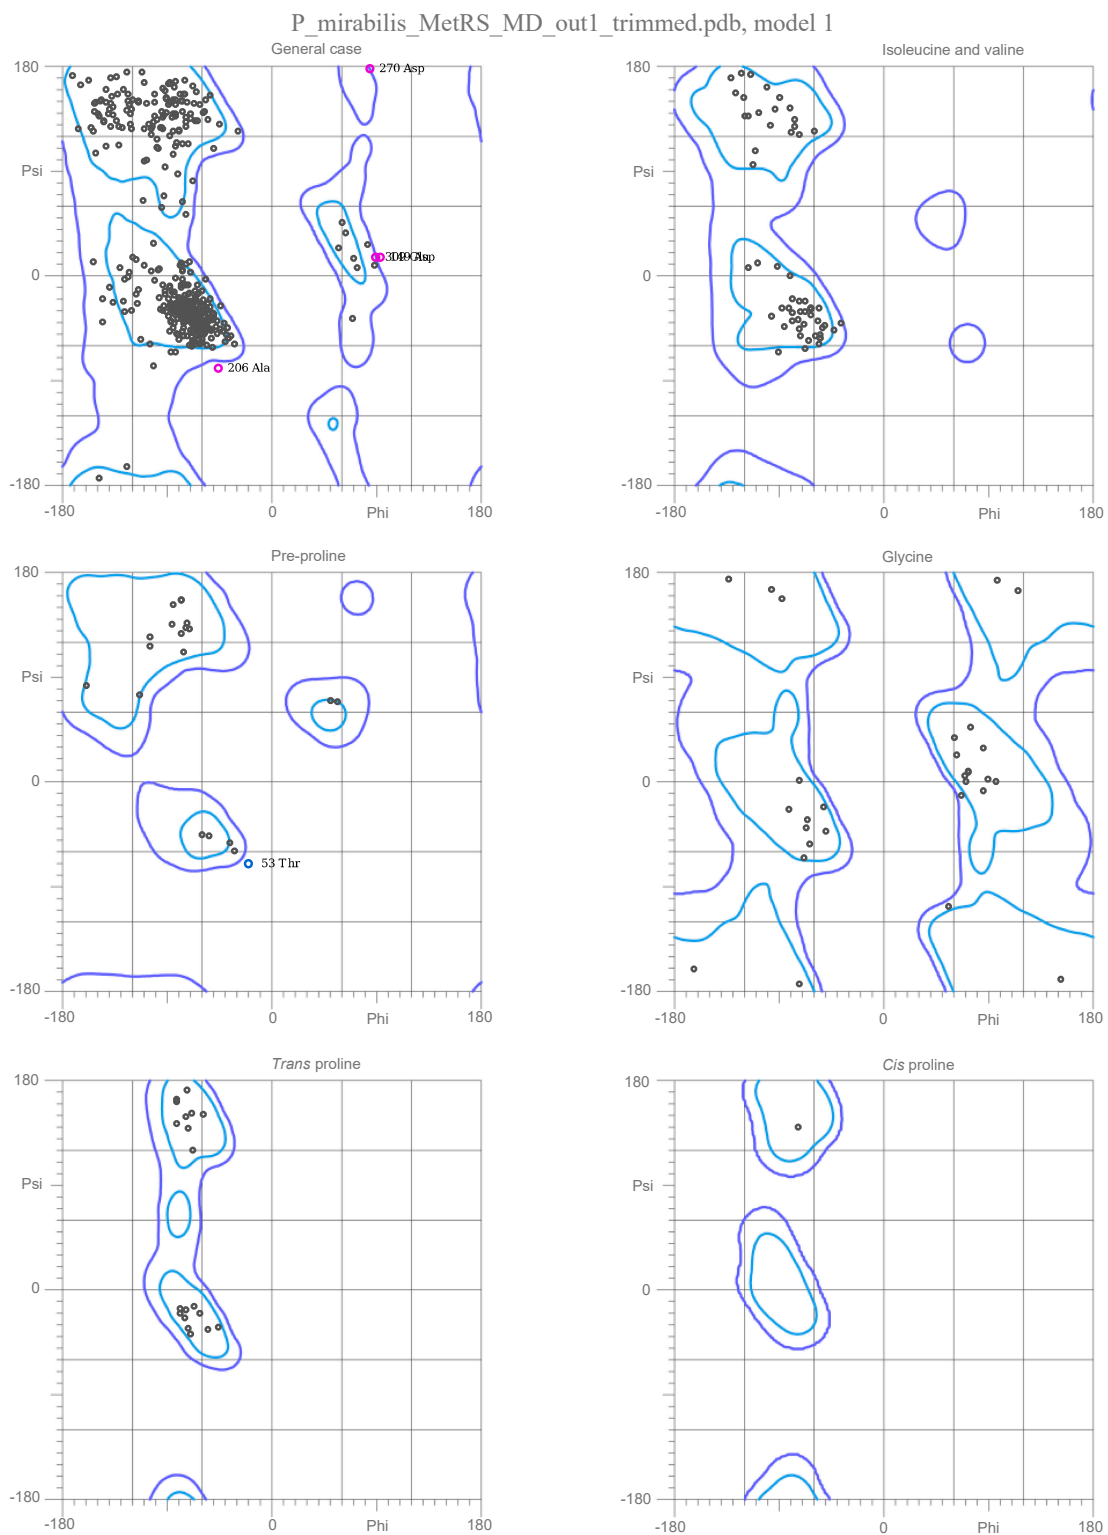

**Figure S4.** Ramachandran plots – *P. mirabilis* MetRS homology model (MolProbability)

# MolProbity Ramachandran analysis

1F4L\_template.pdb, model 1

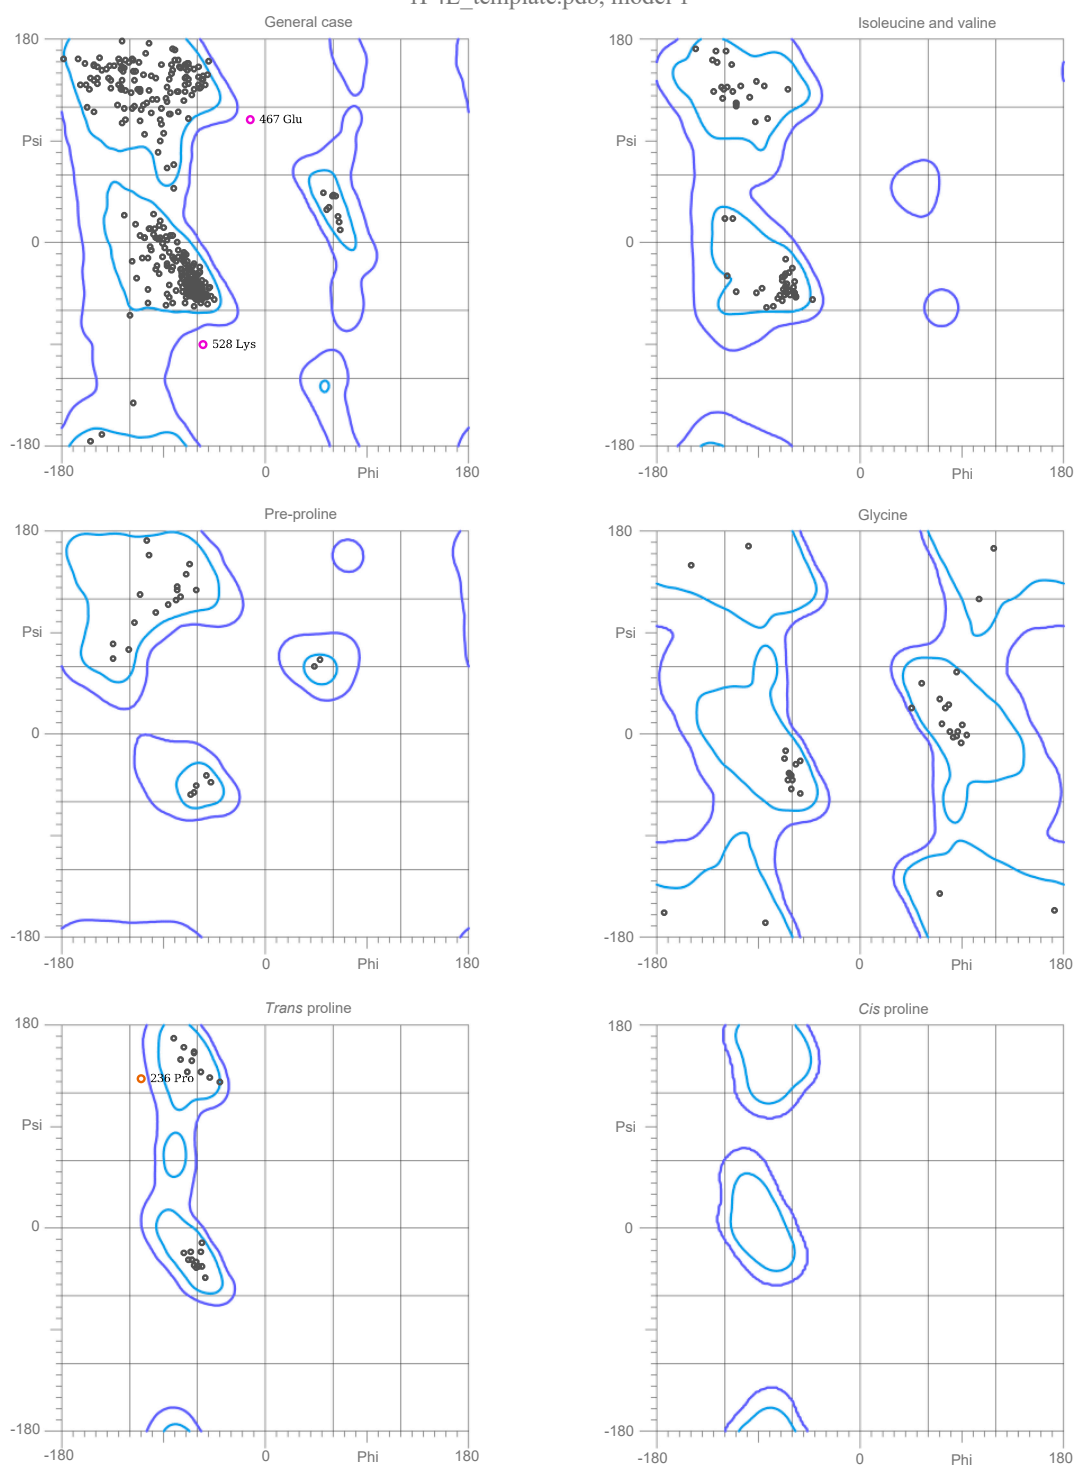

**Figure S5.** Ramachandran plots – *E. coli* MetRS template (1F4L) (MolProbability)

## Methionine

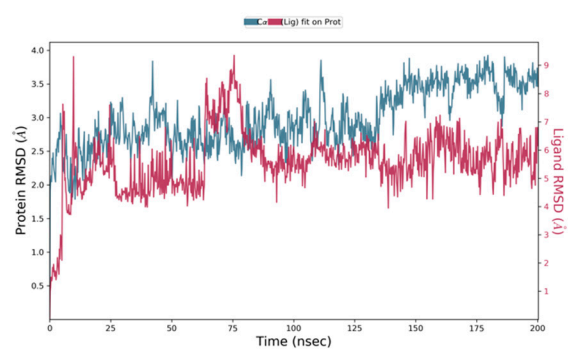

## MPH

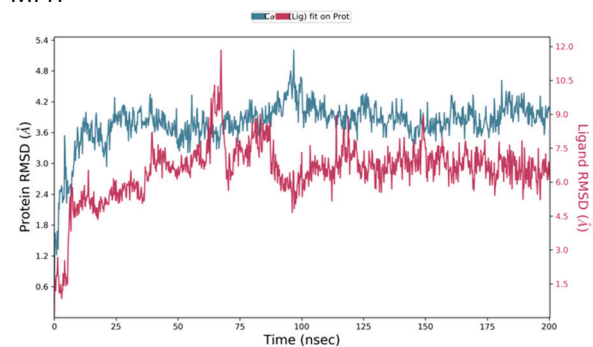

## MPJ

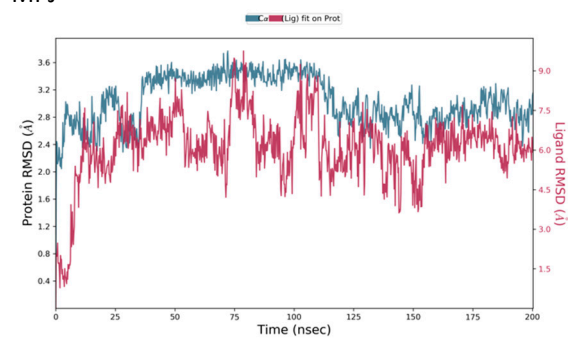

## 2FM

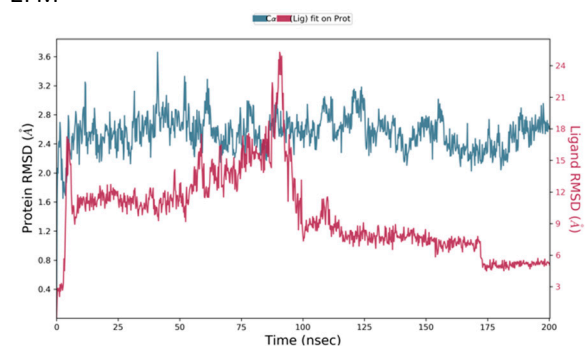

## MF3

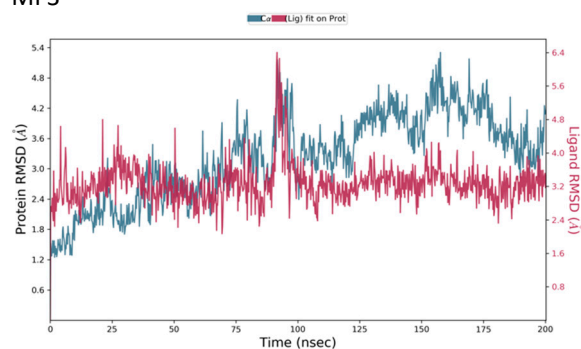

## MSP

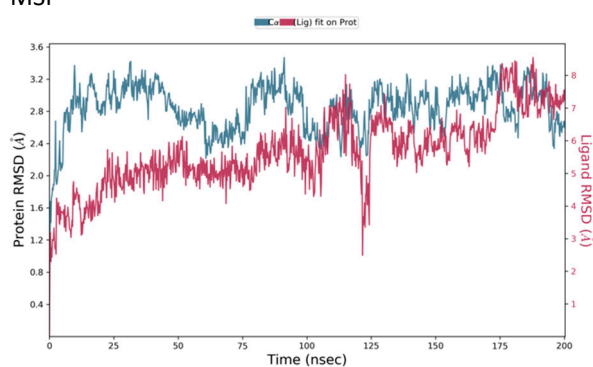

## Methionyl adenylate

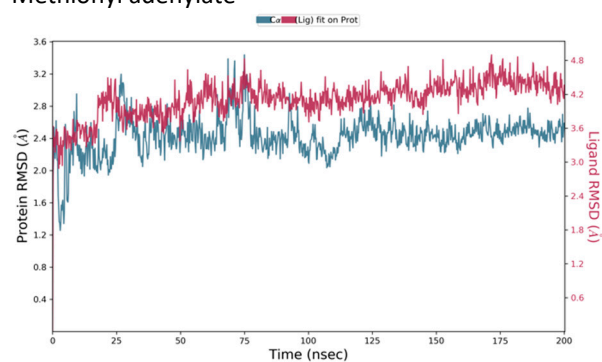

Figure S6. RMSD plots of protein-ligand complexes over 200 ns MD simulation.

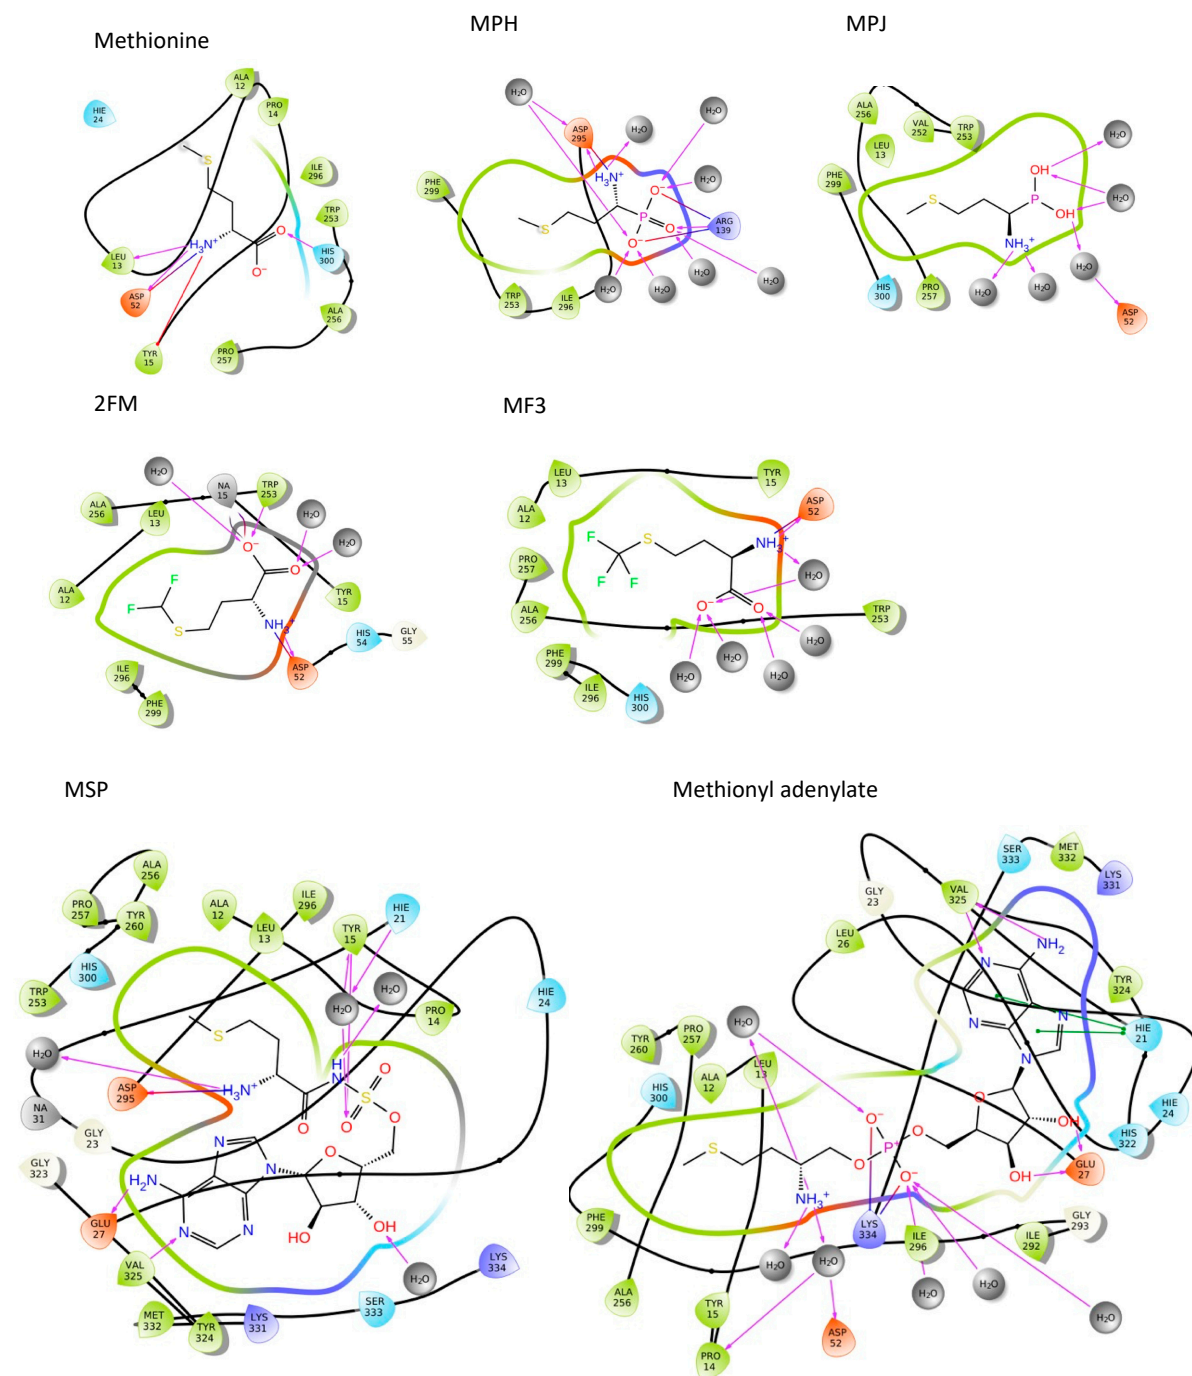

**Figure S7.** 2D ligand interactions of the final frame of the protein-ligand complexes after 200 ns MD simulation.

**A**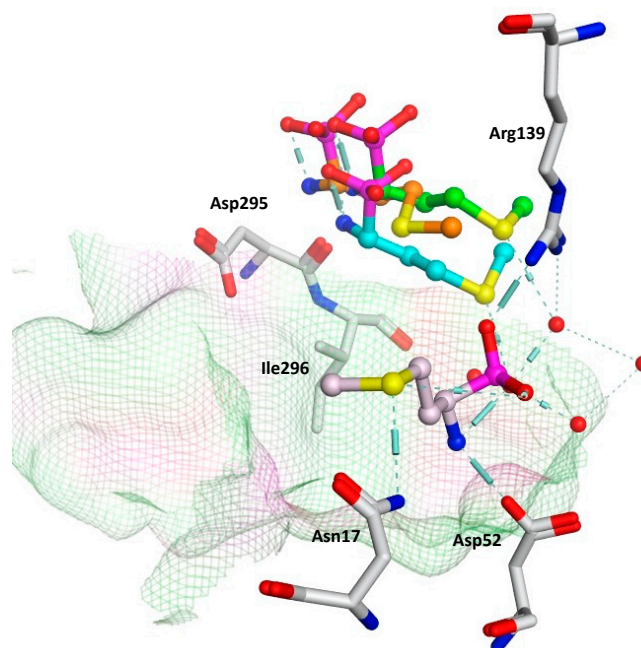**B**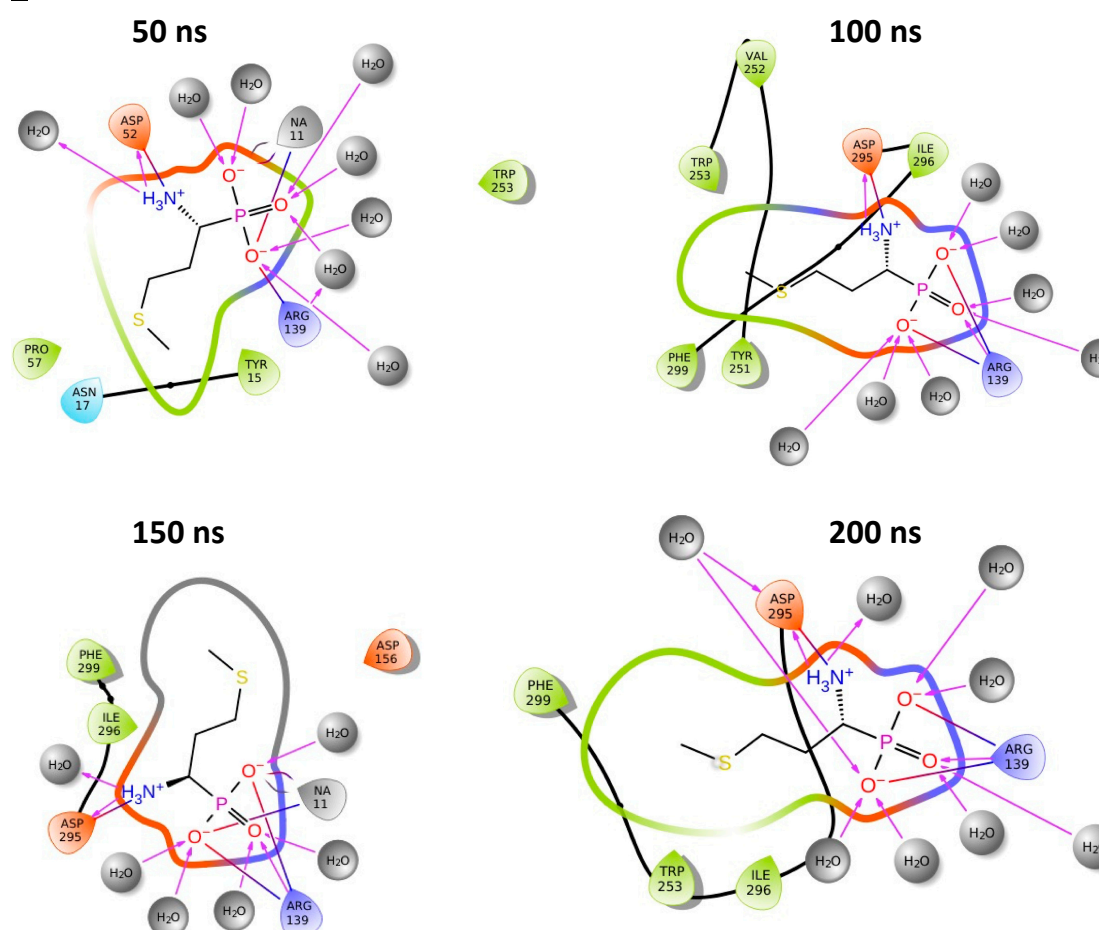

**Figure S8.** (A) Change in position of MPH over 200 ns MD simulation: 50 ns (light pink), 100 ns (green), 150 ns (orange) and 200 ns (turquoise). (B) 2D ligand interactions of the *P. mirabilis* MetRS-MPH complex at 50, 100, 150 and 200 ns MD simulation.



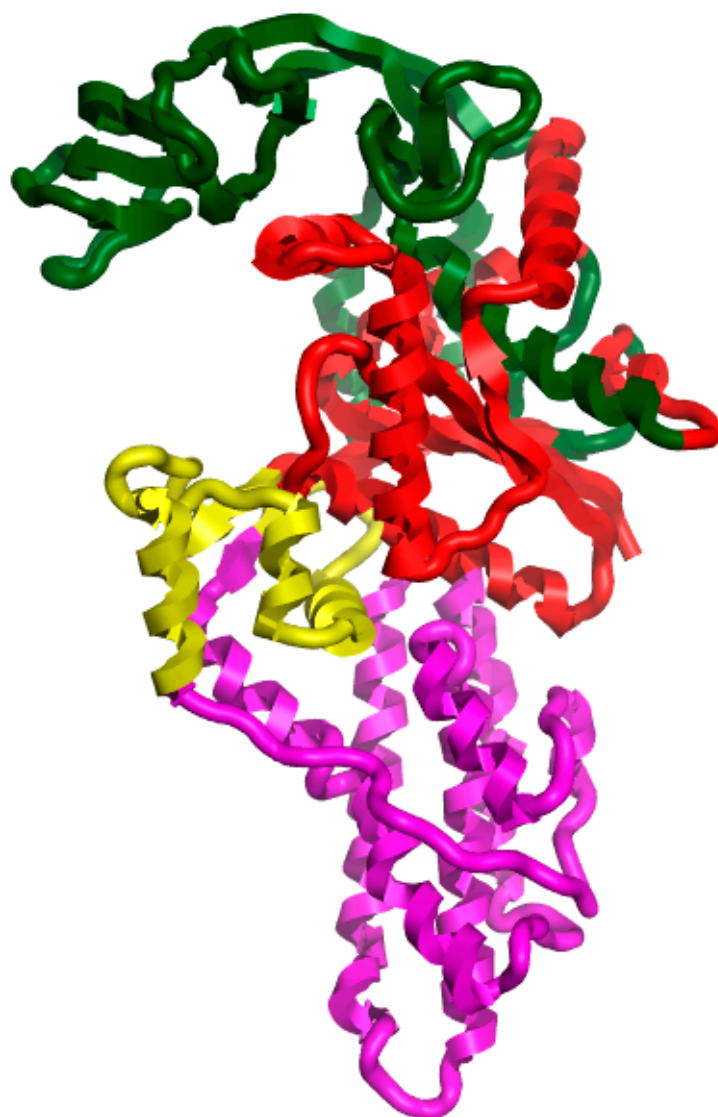

**Figure S9:** Final *P. mirabilis* MetRS homology model with the characteristic domains in ribbon representation: Rossmann fold: red, connective peptide (CP): green, KMSKS domain: yellow and anticodon domain: purple.
